# Supplementary material for: Solid state synthesis, structural characterization and ionic conductivity of bimetallic alkali-metal yttrium borohydrides MY(BH4)4 (M = Li and Na)
Source: Royal Society of Chemistry journal article supplement (doi:10.1039/c6ta02761j), 2016-01-01
Supplement: c6ta02761j2.pdf [file c6ta02761j2.pdf]

# Solid state synthesis, structural characterization and ionic conductivity of bimetallic alkali-metal yttrium borohydrides $MY(\text{BH}_4)_4$ ( $M = \text{Li}$ and $\text{Na}$ )

*Elsa Roedern<sup>a)\*</sup>, Young-Su Lee<sup>b)</sup>, Morten Brix Ley<sup>a)</sup>, Kiho Park<sup>b)</sup>, Young Whan Cho<sup>b)</sup>,*

*Jørgen Skibsted<sup>a)</sup>, Torben René Jensen<sup>a)\*</sup>*

<sup>a)</sup> Interdisciplinary Nanoscience Center (iNANO) and Department of Chemistry, University of Aarhus, Langelandsgade 140, DK-8000 Aarhus C, Denmark.

<sup>b)</sup> High Temperature Energy Materials Research Center, Korea Institute of Science and Technology, Seoul 136-791, Republic of Korea

## SUPPORTING INFORMATION

### Contents

- **Tables**

- **Table S1** - Optimized unit cell parameters and energy with respect to the most stable Li@2a structure.
- **Table S2** - Experimental and DFT-optimized cell parameters and unit cell volume per formula unit ( $V/Z$ ).

- **Figures**

- **Figure S1** - Crystal structure of  $\text{LiY}(\text{BH}_4)_4$ , showing the considered Li positions
- **Figure S2** - Coordination polyhedra for the structure of  $\text{LiY}(\text{BH}_4)_4$  in which Li ions are positioned at (a) 2a, (b) 2b, and (c) 2e Wyckoff sites
- **Figure S3** - Energy change upon displacing Na along x direction while other metal ions are frozen at the original positions.
- **Figure S4** - Volume per formula unit of  $MY(\text{BH}_4)_4$  ( $M = \text{Li}, \text{Na}, \text{K}, \text{Rb}, \text{Cs}$ ) compared to the added volume of  $\text{Y}(\text{BH}_4)_3$  and  $\text{MBH}_4$
- **Figure S5** - Complex impedance spectra (Nyquist plot) of samples **s1-6**
- **Figure S6** -  $\text{NaY}(\text{BH}_4)_4$  Frenkel defect generation.
- **Figure S7** - Vacancy hopping along the z-direction.
- **Figure S8** -  $^{23}\text{Na}$  MAS NMR spectra (14.1 T,  $\nu_R = 8.0$  kHz) of the central-transition region for  $\text{NaY}(\text{BH}_4)_4$ , following its thermal decomposition
- **Figure S9** - High resolution PXD and refinement of  $\text{LiY}(\text{BH}_4)_4$

- **Figure S10** - High resolution PXD and refinement of NaY(BH<sub>4</sub>)<sub>4</sub>, space group *Cmcm*
- **Figure S11** - High resolution PXD and refinement of NaY(BH<sub>4</sub>)<sub>4</sub>, space group *C222<sub>1</sub>*

1.

**Table S1** - Optimized unit cell parameters and energy with respect to the most stable Li@2*a* structure.

|            | <i>a</i> (Å) | <i>c</i> (Å) | Energy (eV/f.u.)     |
|------------|--------------|--------------|----------------------|
| Exp.       | 6.236        | 12.491       |                      |
| 2 <i>a</i> | 6.222        | 12.486       | 0.000<br>(reference) |
| 2 <i>b</i> | 6.461        | 12.538       | 0.348                |
| 2 <i>d</i> | 6.464        | 12.539       | 0.348                |
| 2 <i>e</i> | 6.338        | 12.617       | 0.412                |
| 2 <i>f</i> | 6.332        | 12.954       | 0.350                |
| I-4        | 6.553        | 12.476       | -0.185               |

**Table S2** - Experimental and DFT-optimized cell parameters and unit cell volume per formula unit (*V*/*Z*).

|                         |         | <i>a</i> / Å | <i>b</i> / Å | <i>c</i> / Å | <i>V</i> / <i>z</i> / Å <sup>3</sup> |
|-------------------------|---------|--------------|--------------|--------------|--------------------------------------|
| Exp                     |         | 8.5260       | 12.1358      | 9.0526       | 234.2                                |
| <i>Cmcm</i>             | PBE     | 8.506        | 12.415       | 9.334        | 246.4                                |
|                         | vdW-DF2 | 8.494        | 12.166       | 8.866        | 229.1                                |
| <i>C222<sub>1</sub></i> | PBE     | 9.819        | 12.149       | 9.730        | 290.2                                |
|                         | vdW-DF2 | 8.516        | 12.134       | 8.881        | 229.5                                |

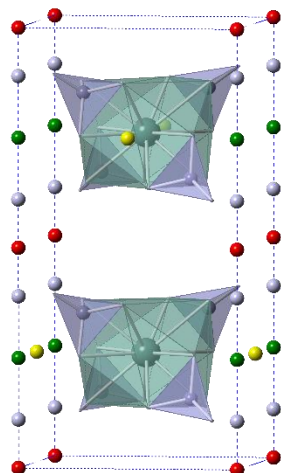

**Figure S1** - Crystal structure of  $\text{LiY}(\text{BH}_4)_4$ , showing the considered Li positions:  $2a$  in green,  $2b$  in yellow,  $2e$  in red,  $4k$  in pale violet.

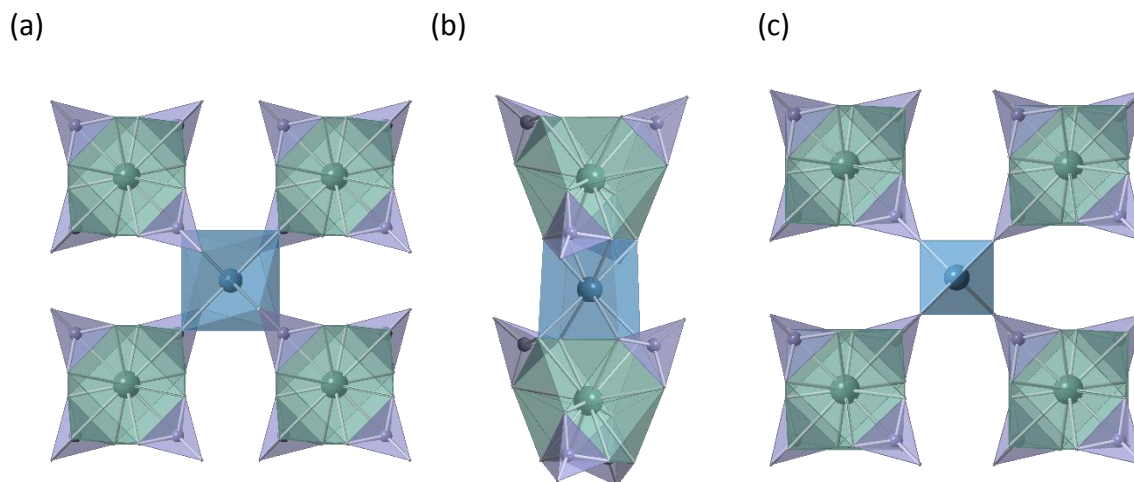

**Figure S2** - Coordination polyhedra for the structure of  $\text{LiY}(\text{BH}_4)_4$  in which Li ions are positioned at (a)  $2a$ , (b)  $2b$ , and (c)  $2e$  Wyckoff sites; green : Y-H, violet: B-H, blue: Li-H.

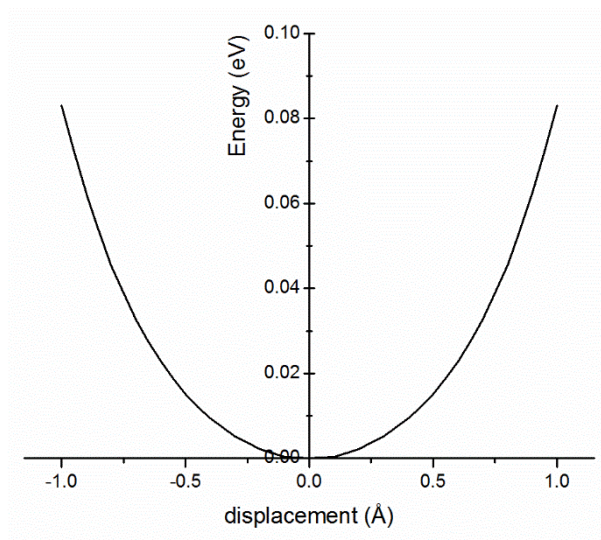

**Figure S3** - Energy change upon displacing Na along x direction while other metal ions are frozen at the original positions.

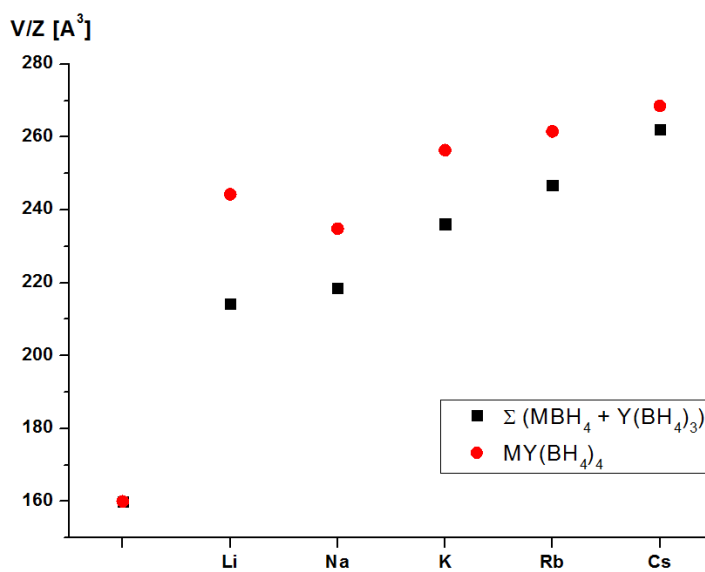

**Figure S4** – Volume per formula unit of  $MY(BH_4)_4$  ( $M = Li, Na, K, Rb, Cs$ ) compared to the sum of unit cell volumes of  $Y(BH_4)_3$  and  $MBH_4$

a) **s1** (black), **s4** (blue)

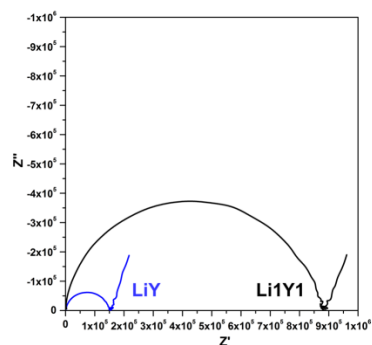

b) **s2** (black), **s5** (blue)

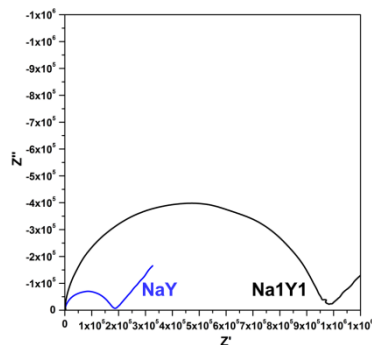

c) **s3** (black), **s6** (blue)

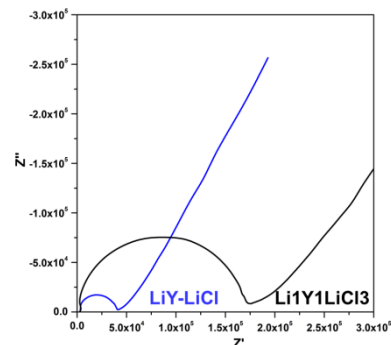

**Figure S5** – Complex impedance spectra (Nyquist plot) of samples a)  $\text{Y}(\text{BH}_4)_3 - \text{LiBH}_4$  (1:1), b)  $\text{Y}(\text{BH}_4)_3 - \text{NaBH}_4$  (1:1) and c)  $\text{YCl}_3 - \text{LiBH}_4$  (1:4) before (black) and after quenching (blue).

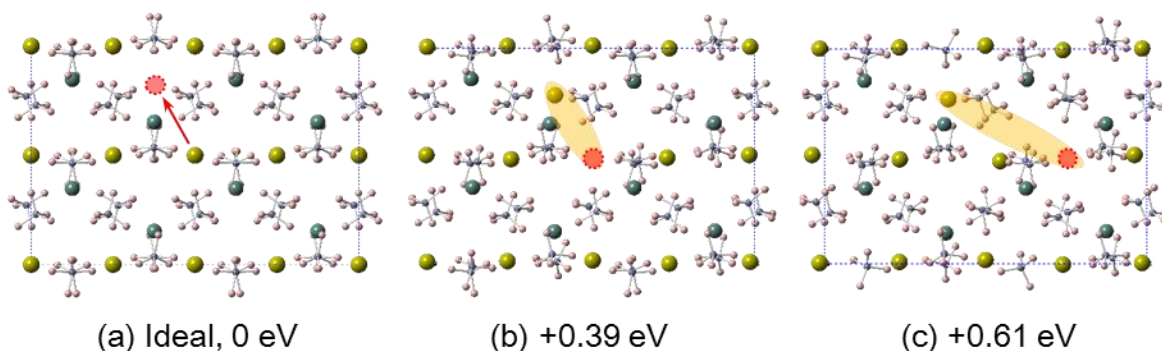

**Figure S6** - (a)  $\text{NaY}(\text{BH}_4)_4$  in the ideal configuration. The red circle marks a possible interstitial site and a Frenkel defect can be generated by the movement of Na ion as indicated by the red arrow. A vacancy-interstitial pair located (b) nearby and (c) apart.

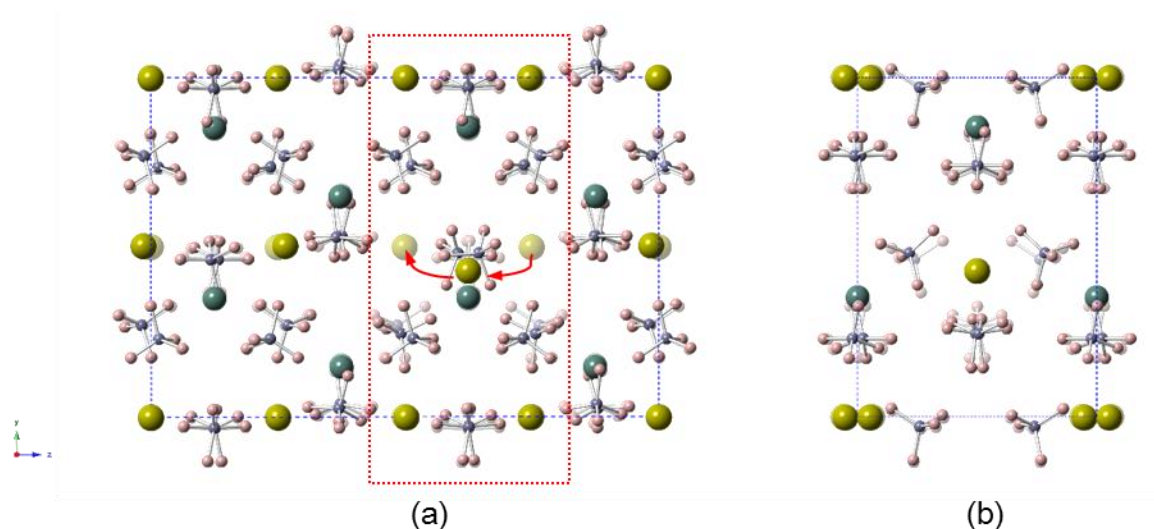

**Figure S7** - (a) Vacancy hopping along the z-direction. Na ion is at the saddle point. The view direction is [100]. (b) Cross section image at the saddle point. The view direction is [001]. In both (a) and (b), the background translucent image shows the ideal configuration.

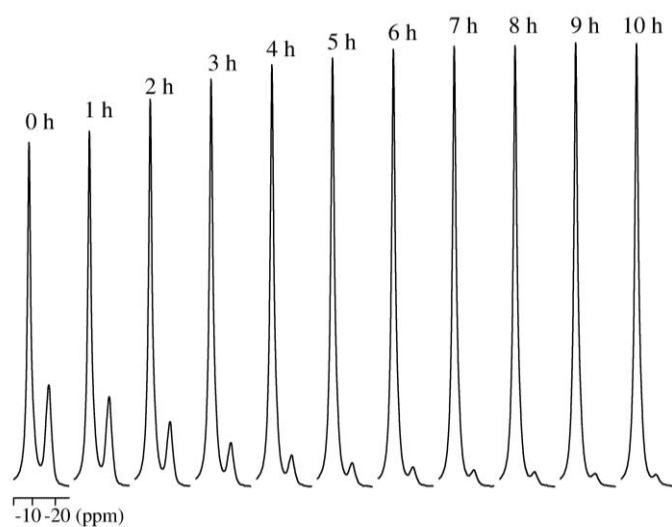

**Figure S8.**  $^{23}\text{Na}$  MAS NMR spectra (14.1 T,  $\nu_R = 8.0$  kHz) of the central-transition region for  $\text{NaY}(\text{BH}_4)_4$ , following its thermal decomposition from shortly after its synthesis by quenching to 10 h of isothermal decomposition in the spinning NMR rotor ( $T = 24 \pm 2$  °C). The acquisition time for each spectrum was 15 min and every fourth spectrum is shown. The time indicates the beginning of the data acquisition.

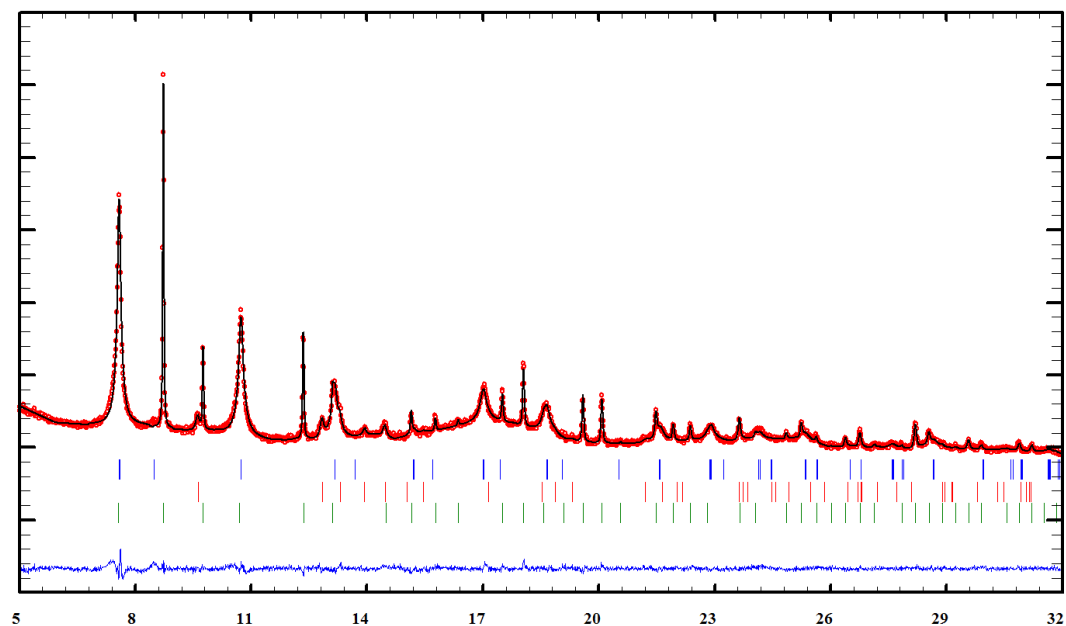

**Figure S9** – High resolution PXD of  $\text{LiY}(\text{BH}_4)_4$ , obtained at room temperature, BLI11, Diamond,  $\lambda = 0.825770 \text{ \AA}$ , red circles: exp. data, black line: refined profile, blue line: difference pattern. Vertical dashes: reflexes of crystal phases:  $\text{LiY}(\text{BH}_4)_4$  (top,  $R_{\text{Bragg}} = 5.3\%$ ),  $\text{LiBH}_4$  (middle,  $R_{\text{Bragg}} = 1.5\%$ ),  $\alpha\text{-Y}(\text{BH}_4)_3$  (bottom,  $R_{\text{Bragg}} = 8.3\%$ )

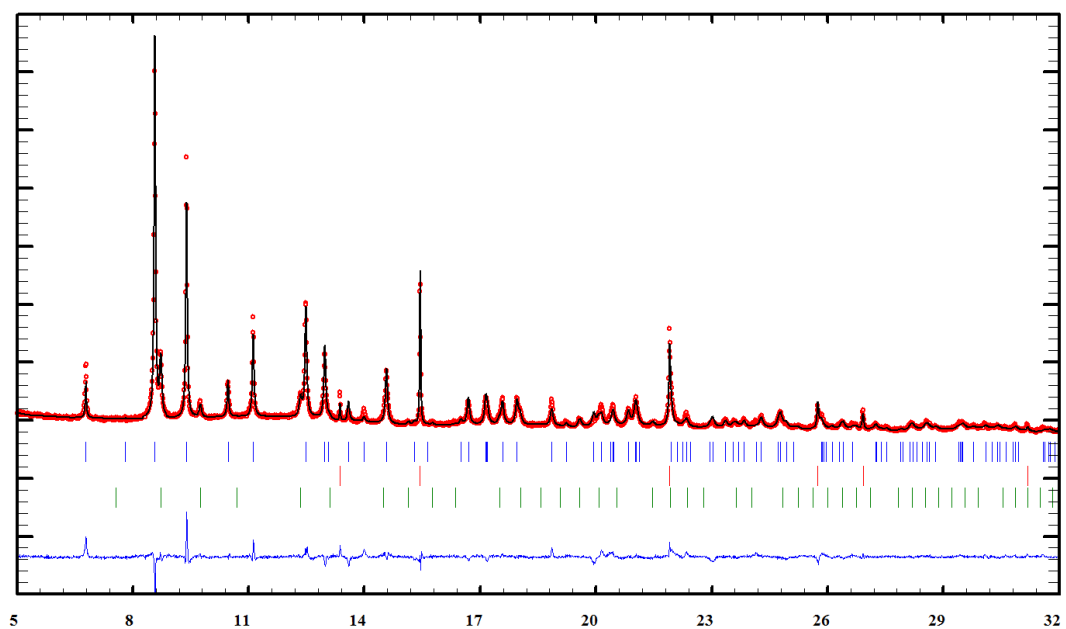

**Figure S10** – High resolution PXD of  $\text{NaY}(\text{BH}_4)_4$ , obtained at room temperature, BLI11, Diamond,  $\lambda = 0.825770 \text{ \AA}$ , red circles: exp. data, black line: refined profile, blue line: difference pattern. Vertical dashes: reflexes of crystal phases: C2221 -  $\text{NaY}(\text{BH}_4)_4$  (top,  $R_{\text{Bragg}} = 8.7\%$ ),  $\text{NaBH}_4$  (middle,  $R_{\text{Bragg}} = 10.4\%$ ),  $\alpha\text{-Y}(\text{BH}_4)_3$  (bottom,  $R_{\text{Bragg}} = 7.9\%$ )

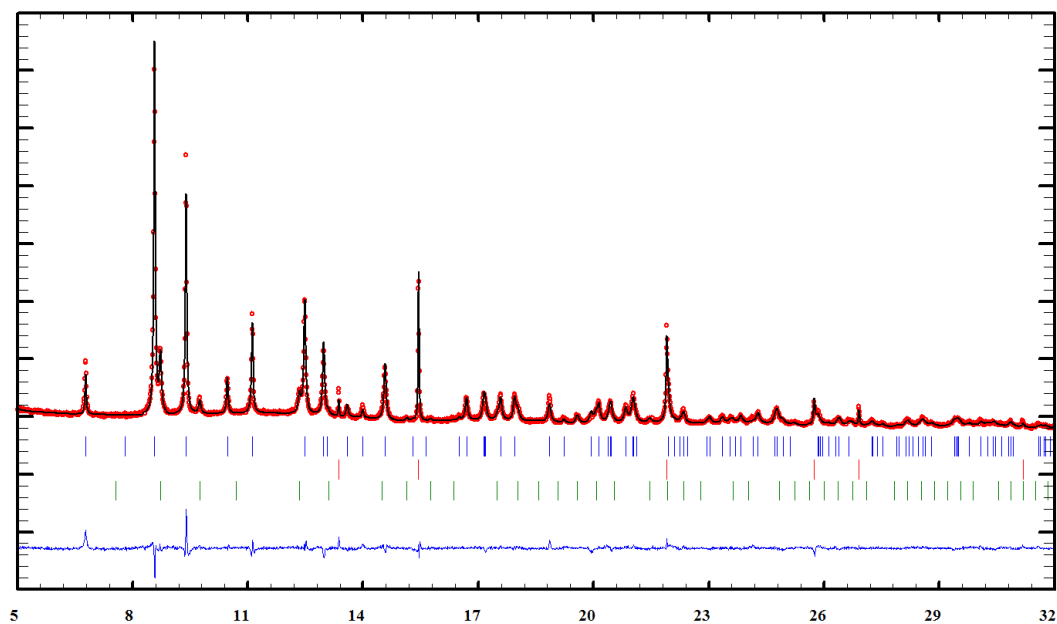

**Figure S11** - High resolution PXD of  $\text{NaY}(\text{BH}_4)_4$ , obtained at room temperature, BLI11, Diamond,  $\lambda = 0.825770 \text{ \AA}$ , red circles: exp. data, black line: refined profile, blue line: difference pattern. Vertical dashes: reflexes of crystal phases: *Cmcm* -  $\text{NaY}(\text{BH}_4)_4$  (top,  $R_{\text{Bragg}} = 7.7\%$ ),  $\text{NaBH}_4$  (middle,  $R_{\text{Bragg}} = 12.3\%$ ),  $\alpha\text{-Y}(\text{BH}_4)_3$  (bottom,  $R_{\text{Bragg}} = 7.3\%$ ).
